# Supplementary material for: Tools and pipelines for BioNano data: molecule assembly pipeline and FASTA super scaffolding tool
Source: PubMed Central journal article supplement (PMC4587741; doi:10.1186/s12864-015-1911-8), 2015-09-29
Supplement: 12864_2015_1911_MOESM5_ESM.pdf [file 12864_2015_1911_MOESM5_ESM.pdf]

## Additional file 5

Jennifer Shelton<sup>1</sup>, Cassondra Coleman<sup>2</sup>, Nic Herndon<sup>3</sup>, Nanyan Lu<sup>4</sup>, Ernest Lam<sup>5</sup>, Thomas Anantharaman<sup>6</sup>, Palak Sheth<sup>7</sup>, and Sue Brown<sup>8</sup>

<sup>1</sup>*Kansas State University*

<sup>2</sup>*Affiliation not available*

<sup>3</sup>*Affiliation not available*

<sup>4</sup>*Affiliation not available*

<sup>5</sup>*Affiliation not available*

<sup>6</sup>*Affiliation not available*

<sup>7</sup>*Affiliation not available*

<sup>8</sup>*Affiliation not available*

June 11, 2015

### Abstract

#### **Additional file 5 — ChLGs before and after super scaffolding**

Alignments of Tcas5.0 and Tcas5.2 *in silico* maps to consensus genome maps for all ChLGs. Consensus genome maps (blue with molecule coverage shown in dark blue) aligned to the *in silico* maps (green with contigs overlaid as translucent colored squares). Alignment to both Tcas5.2 super scaffolds (top alignment) and Tcas5.0 scaffolds (bottom alignment) are shown.

## Competing interests

JMS, MCC, NH, NL, and SJB declare that they have no competing interests. ETL, PS and TA are employees at BioNano Genomics and hold stock options.

## Figures

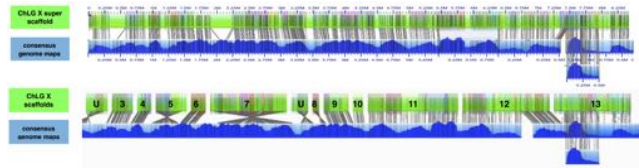

Figure 1: **Chromosome Linkage Group X.** ChLGX before and after super scaffolding viewed in IrysView.

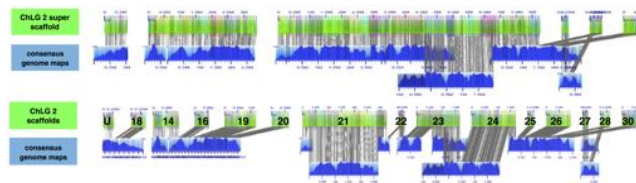

Figure 2: **Chromosome Linkage Group 2.** ChLG2 before and after super scaffolding viewed in IrysView.

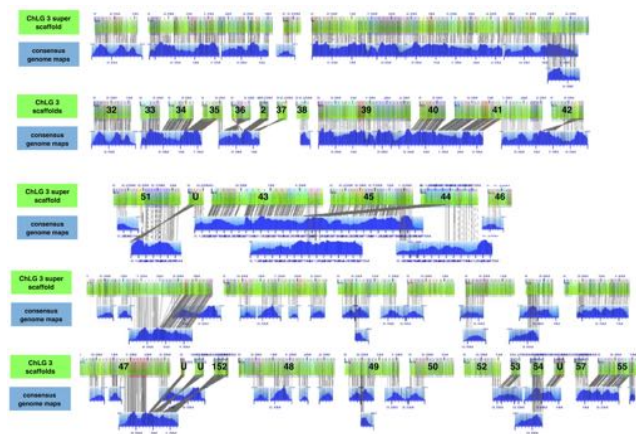

Figure 3: **Chromosome Linkage Group 3.** ChLG3 before and after super scaffolding viewed in IrysView.

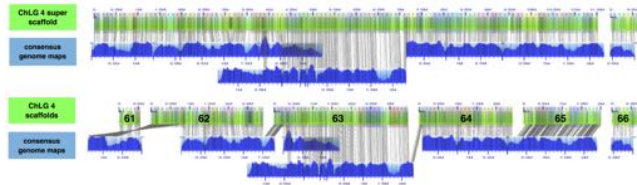

Figure 4: **Chromosome Linkage Group 4.** ChLG4 before and after super scaffolding viewed in IrysView.

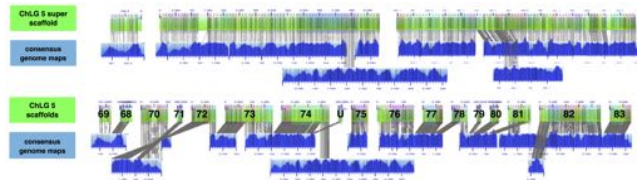

Figure 5: **Chromosome Linkage Group 5.** ChLG5 before and after super scaffolding viewed in IrysView.

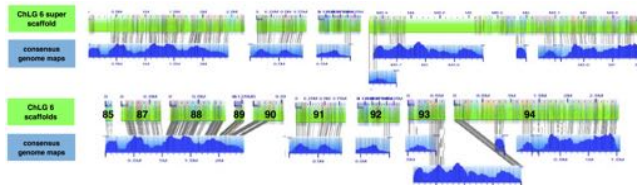

Figure 6: **Chromosome Linkage Group 6.** ChLG6 before and after super scaffolding viewed in IrysView.

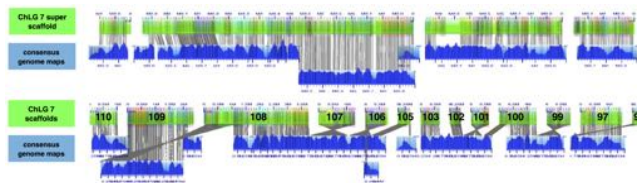

Figure 7: **Chromosome Linkage Group 7.** ChLG7 before and after super scaffolding viewed in IrysView.

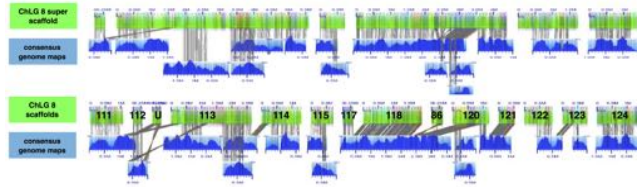

Figure 8: **Chromosome Linkage Group 8**. ChLG8 before and after super scaffolding viewed in IrysView.

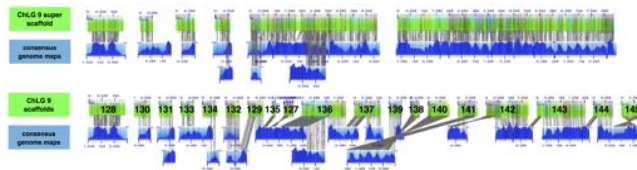

Figure 9: **Chromosome Linkage Group 9**. ChLG9 before and after super scaffolding viewed in IrysView.

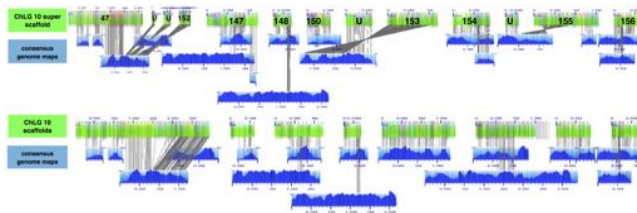

Figure 10: **Chromosome Linkage Group 10**. ChLG10 before and after super scaffolding viewed in IrysView.
